# Supplementary material for: Self-assembly of cobalt(ii) and zinc(ii) tetranitrooctaethylporphyrin via bidentate axial ligands: synthesis, structure, surface morphology and effect of axial coordination
Source: Royal Society of Chemistry journal article supplement (doi:10.1039/c3nj01248d), 2013-11-30
Supplement: c3nj01248d.pdf [file c3nj01248d.pdf]

## **Supporting Information**

### **Self-assembly of cobalt(II) and zinc(II) tetranitro octaethylporphyrin *via* bidentate axial ligands: synthesis, structure, surface morphology and effect of axial coordination**

Soumyajit Dey, Sk Asif Ikbal and Sankar Prasad Rath\*

Department of Chemistry, Indian Institute of Technology Kanpur, Kanpur-208016, INDIA.

Email: [sprath@iitk.ac.in](mailto:sprath@iitk.ac.in)

**Table S1.** Crystal Data and Data Collection Parameters

|                                                                 | [1]•L <sup>1</sup>                                                                            | [1]•L <sup>2</sup>                                                   | [2] <sub>2</sub> •L <sup>1</sup>                                                                    | [2] <sub>2</sub> •L <sup>2</sup>                                                          | [2] <sub>2</sub> •L <sup>3</sup>                                                   |
|-----------------------------------------------------------------|-----------------------------------------------------------------------------------------------|----------------------------------------------------------------------|-----------------------------------------------------------------------------------------------------|-------------------------------------------------------------------------------------------|------------------------------------------------------------------------------------|
| <i>T</i> , K                                                    | 100(2)                                                                                        | 100(2)                                                               | 100(2)                                                                                              | 100(2)                                                                                    | 100(2)                                                                             |
| Formula                                                         | C <sub>47.50</sub> H <sub>49.50</sub><br>C <sub>14.50</sub> Co N <sub>12</sub> O <sub>8</sub> | C <sub>48</sub> H <sub>48</sub> Co<br>N <sub>12</sub> O <sub>8</sub> | C <sub>86</sub> H <sub>92</sub> Cl <sub>12</sub> N <sub>20</sub><br>O <sub>16</sub> Zn <sub>2</sub> | C <sub>99.60</sub> H <sub>121.20</sub><br>N <sub>20</sub> O <sub>16</sub> Zn <sub>2</sub> | C <sub>84</sub> H <sub>90</sub> N <sub>20</sub><br>O <sub>16</sub> Zn <sub>2</sub> |
| Formula weight                                                  | 1134.95                                                                                       | 979.91                                                               | 2217.94                                                                                             | 1985.31                                                                                   | 1766.50                                                                            |
| Crystal system                                                  | Triclinic                                                                                     | Tetragonal                                                           | Monoclinic                                                                                          | Monoclinic                                                                                | Triclinic                                                                          |
| Space group                                                     | P-1                                                                                           | I 41/a                                                               | P21/c                                                                                               | P21/c                                                                                     | P-1                                                                                |
| <i>a</i> , Å                                                    | 12.274(5)                                                                                     | 17.158(3)                                                            | 11.3631(11)                                                                                         | 13.9272(19)                                                                               | 12.924(3)                                                                          |
| <i>b</i> , Å                                                    | 13.707(5)                                                                                     | 17.158(3)                                                            | 33.868(3)                                                                                           | 37.718(5)                                                                                 | 13.663(3)                                                                          |
| <i>c</i> , Å                                                    | 18.913(5)                                                                                     | 15.910(5)                                                            | 26.769(3)                                                                                           | 11.3170(15)                                                                               | 13.678(3)                                                                          |
| <i>α</i> , deg                                                  | 107.964(5) <sup>o</sup>                                                                       | 90                                                                   | 90                                                                                                  | 90                                                                                        | 69.774(4)                                                                          |
| <i>β</i> , deg                                                  | 104.161(5) <sup>o</sup>                                                                       | 90                                                                   | 101.816(2)                                                                                          | 110.296(2)                                                                                | 66.261(4)                                                                          |
| <i>γ</i> , deg                                                  | 98.063(5) <sup>o</sup>                                                                        | 90                                                                   | 90                                                                                                  | 90                                                                                        | 85.852(4)                                                                          |
| <i>V</i> , Å <sup>3</sup>                                       | 2853.4(17)                                                                                    | 4683.6(19)                                                           | 10083.6(17)                                                                                         | 5575.8(13)                                                                                | 2068.3(8)                                                                          |
| Radiation (λ, Å)                                                | Mo Kα<br>(0.71073)                                                                            | Mo Kα<br>(0.71073)                                                   | Mo Kα<br>(0.71073)                                                                                  | Mo Kα<br>(0.71073)                                                                        | Mo Kα<br>(0.71073)                                                                 |
| <i>Z</i>                                                        | 2                                                                                             | 4                                                                    | 4                                                                                                   | 2                                                                                         | 1                                                                                  |
| <i>d</i> <sub>calcd.</sub> g•cm <sup>-3</sup>                   | 1.321                                                                                         | 1.390                                                                | 1.461                                                                                               | 1.182                                                                                     | 1.418                                                                              |
| <i>μ</i> , mm <sup>-1</sup>                                     | 0.570                                                                                         | 0.434                                                                | 0.865                                                                                               | 0.497                                                                                     | 0.660                                                                              |
| <i>F</i> (000)                                                  | 1172                                                                                          | 2044                                                                 | 4560                                                                                                | 2094                                                                                      | 922                                                                                |
| No. of unique data                                              | 10363                                                                                         | 2174                                                                 | 17739                                                                                               | 9804                                                                                      | 7237                                                                               |
| No. of params. Refined                                          | 612                                                                                           | 164                                                                  | 1113                                                                                                | 559                                                                                       | 558                                                                                |
| GOF on <i>F</i> <sup>2</sup>                                    | 0.939                                                                                         | 1.047                                                                | 0.969                                                                                               | 0.916                                                                                     | 1.065                                                                              |
| <i>R</i> <sub>1</sub> <sup>a</sup> [ <i>I</i> > 2σ( <i>I</i> )] | 0.0815                                                                                        | 0.0577                                                               | 0.0730                                                                                              | 0.0524                                                                                    | 0.0676                                                                             |
| <i>R</i> <sub>1</sub> <sup>a</sup> (all data)                   | 0.1188                                                                                        | 0.0771                                                               | 0.1004                                                                                              | 0.0794                                                                                    | 0.0799                                                                             |
| w <i>R</i> <sub>2</sub> <sup>b</sup> (all data)                 | 0.2400                                                                                        | 0.1615                                                               | 0.2020                                                                                              | 0.1335                                                                                    | 0.1974                                                                             |

$$a \ R_1 = \frac{\sum ||F_o| - |F_c||}{\sum |F_o|}; \quad b \ wR_2 = \sqrt{\frac{\sum [w(F_o^2 - F_c^2)]^2}{\sum [w(F_o^2)]^2}}$$

**Table S2.** Selected Bond Distances (Å) and Angles (°)

| Bond length, (Å)  | [1]•L <sup>1</sup> | [1]•L <sup>2</sup> | [2] <sub>2</sub> •L <sup>1</sup> |            | [2] <sub>2</sub> •L <sup>2</sup> | [2] <sub>2</sub> •L <sup>3</sup> |
|-------------------|--------------------|--------------------|----------------------------------|------------|----------------------------------|----------------------------------|
|                   |                    |                    | core I                           | core II    |                                  |                                  |
| M(1)-N(1)         | 1.984(4)           | 1.975(2)           | 2.059(3)                         | 2.075(3)   | 2.055(2)                         | 2.076(4)                         |
| M(1)-N(2)         | 1.975(4)           |                    | 2.079(3)                         | 2.086(3)   | 2.068(3)                         | 2.083(4)                         |
| M(1)-N(3)         | 1.976(4)           |                    | 2.092(3)                         | 2.086(3)   | 2.075(2)                         | 2.079(4)                         |
| M(1)-N(4)         | 1.996(4)           |                    | 2.073(3)                         | 2.068(3)   | 2.083(3)                         | 2.077(4)                         |
| M(1)-N(5)         | 2.260(4)           | 2.291(3)           | 2.182(3)                         | 2.180(3)   | 2.182(2)                         | 2.114(4)                         |
| M(1)-N(6)         | 2.277(4)           |                    |                                  |            |                                  |                                  |
| Bond angles,(deg) |                    |                    |                                  |            |                                  |                                  |
| N(1)-M(1)-N(2)    | 89.78(16)          |                    | 89.70(12)                        | 88.66(12)  | 89.07(11)                        | 89.13(15)                        |
| N(1)-M(1)-N(3)    | 174.10(14)         |                    | 168.39(12)                       | 161.64(12) | 167.98(9)                        | 155.71(16)                       |
| N(1)-M(1)-N(4)    | 90.82(15)          |                    | 89.01(13)                        | 89.48(12)  | 89.82(10)                        | 87.45(15)                        |
| N(2)-M(1)-N(3)    | 90.66(15)          |                    | 88.79(12)                        | 88.71(12)  | 88.72(10)                        | 87.70(15)                        |
| N(2)-M(1)-N(4)    | 173.88(14)         |                    | 161.24(12)                       | 168.55(12) | 161.47(9)                        | 162.72(16)                       |
| N(3)-M(1)-N(4)    | 89.36(15)          |                    | 88.72(12)                        | 89.51(12)  | 88.53(9)                         | 88.48(15)                        |
| N(1)-M(1)-N(5)    | 85.83(14)          | 86.80(7)           | 95.53(12)                        | 99.14(11)  | 95.20(9)                         | 100.34(15)                       |
| N(2)-M(1)-N(5)    | 93.81(15)          |                    | 98.97(12)                        | 96.06(12)  | 99.84(10)                        | 95.67(15)                        |
| N(3)-M(1)-N(5)    | 88.27(14)          |                    | 96.08(12)                        | 99.21(11)  | 96.82(9)                         | 103.94(15)                       |
| N(4)-M(1)-N(5)    | 92.30(14)          |                    | 99.78(12)                        | 95.39(12)  | 98.68(9)                         | 101.61(16)                       |
| N(1)-M(1)-N(6)    | 92.64(14)          |                    |                                  |            |                                  |                                  |
| N(2)-M(1)-N(6)    | 85.82(14)          |                    |                                  |            |                                  |                                  |
| N(3)-M(1)-N(6)    | 93.26(14)          |                    |                                  |            |                                  |                                  |
| N(4)-M(1)-N(6)    | 88.08(14)          |                    |                                  |            |                                  |                                  |
| N(5)-M(1)-N(6)    | 178.43(14)         |                    |                                  |            |                                  |                                  |

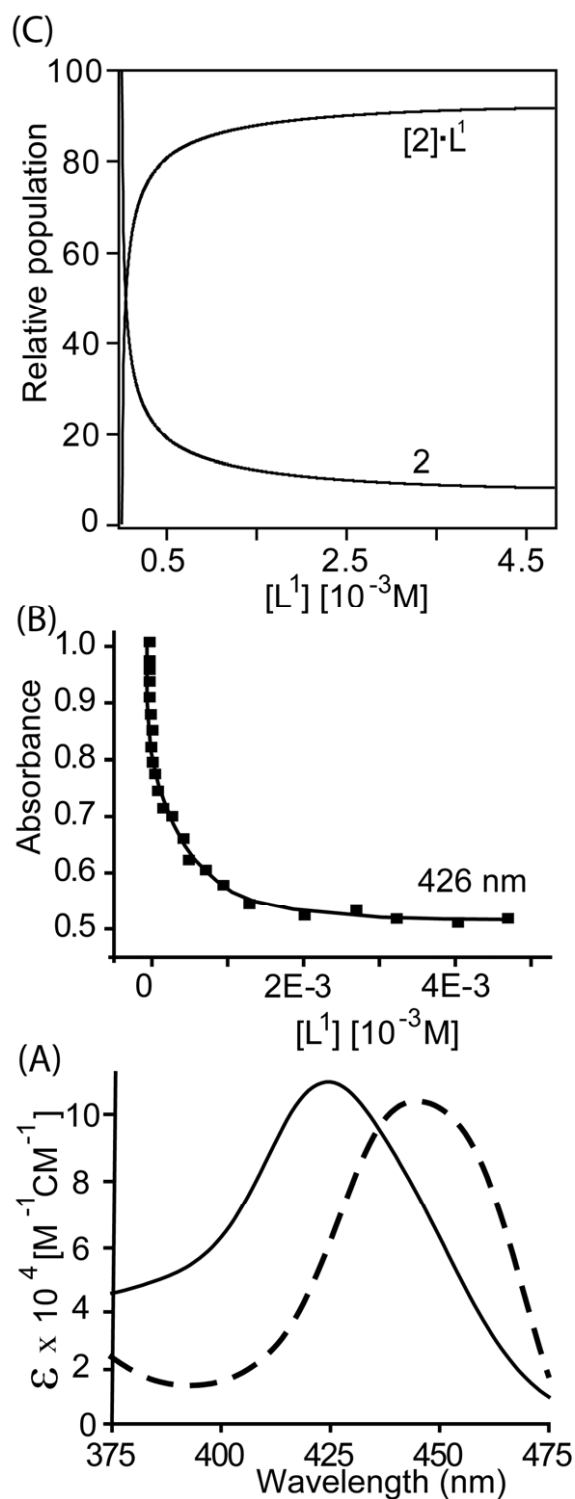

**Figure S1.** (A) Calculated UV-visible spectra of 2 (solid line) and [2]<sub>1</sub>·L<sup>1</sup> (dashed line) complexes formed between 2 and L<sup>1</sup>. (B) Fits of the absorbance data at selected wavelength 426 nm. (C) Species distribution plot of the 2 and [2]<sub>1</sub>·L<sup>1</sup> complexes.

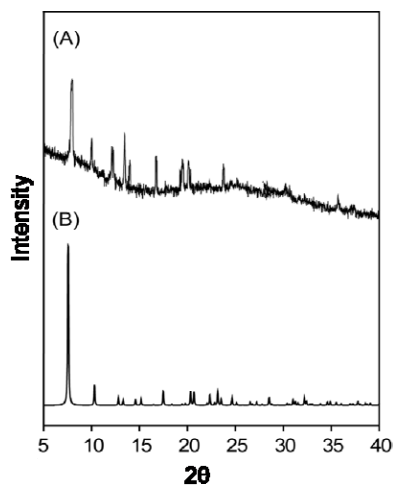

**Figure S2.** PXRD profiles of  $[1] \cdot L^2$ : (A) bulk powder sample of the complex at 295 K, and (B) simulated pattern obtained from X-ray structure at 100 K.

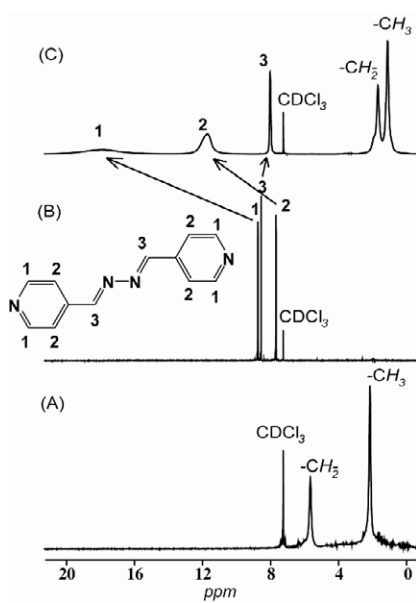

**Figure S3.**  $^1\text{H}$  NMR spectra in  $\text{CDCl}_3$  (at 295 K) of (A)  $\text{Co}^{\text{II}}(\text{tn-OEP})$ , **1**, (B)  $L^2$ , and (C)  $[1] \cdot L^2$

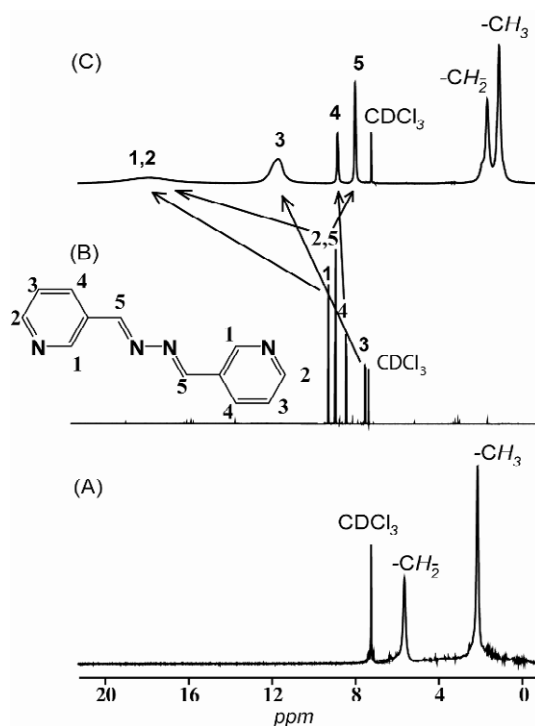

**Figure S4.**  $^1\text{H}$  NMR spectra in  $\text{CDCl}_3$  (at 295 K) of (A)  $\text{Co}(tn\text{-OEP})$ , **1**, (B)  $\text{L}^3$  and (C)  $[\mathbf{1}] \cdot \text{L}^3$

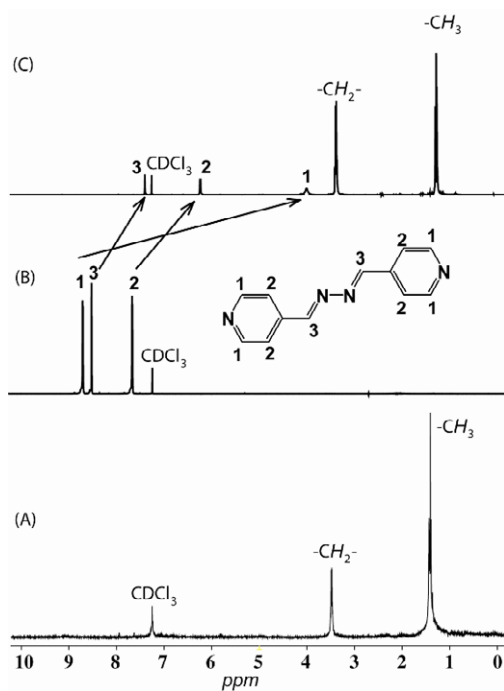

**Figure S5.**  $^1\text{H}$  NMR spectra in  $\text{CDCl}_3$  (at 295 K) of (A)  $\text{Zn}(tn\text{-OEP})$ , **2**, (B)  $\text{L}^2$ , and (C)  $[\mathbf{2}]_2 \cdot \text{L}^2$

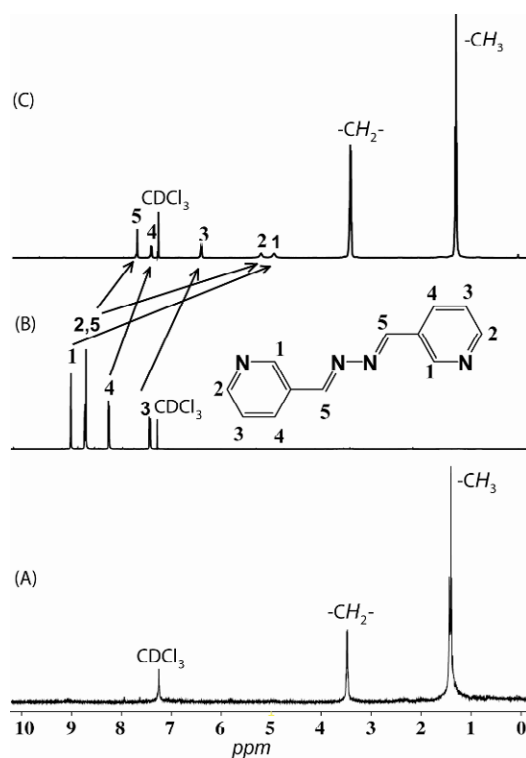

**Figure S6.**  $^1\text{H}$  NMR spectra in  $\text{CDCl}_3$  (at 295 K) of (A)  $\text{Zn}(\text{tn-OEP})$ , **2**, (B)  $\text{L}^3$  and (C)  $[\mathbf{2}]_2 \cdot \text{L}^3$ .

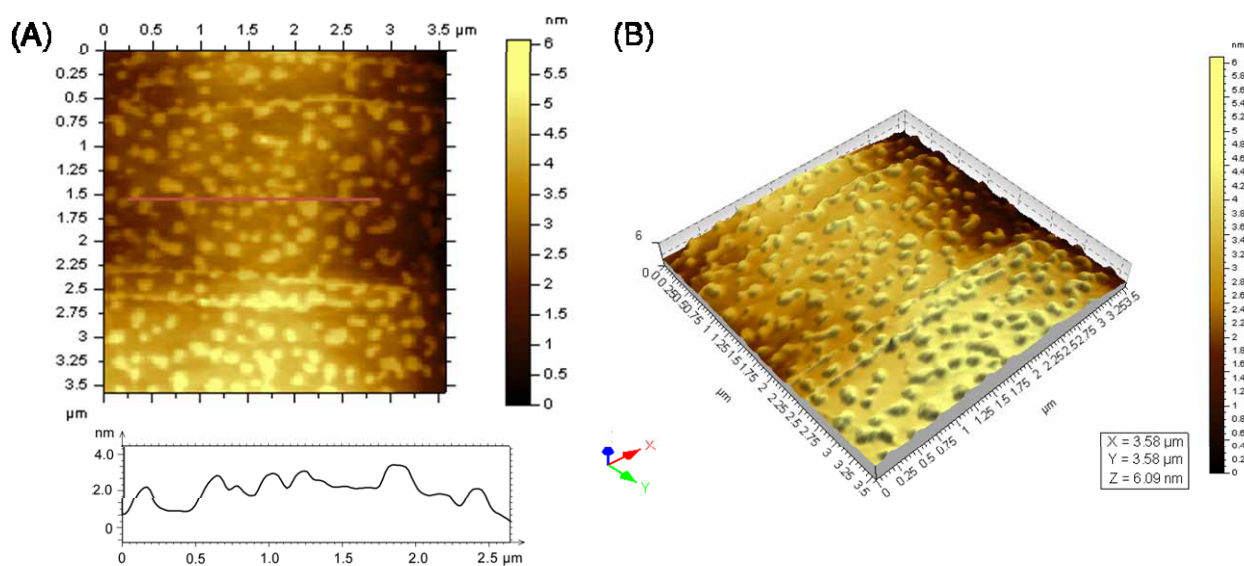

**Figure S7.** Topographic AFM images and 3D view of  $[2]_2 \bullet L^3$  (A, B) drop cast onto HOPG from  $5 \times 10^{-6}$  M solution in tetrahydrofuran. The contours in the frames below the images correspond to the line in the images.

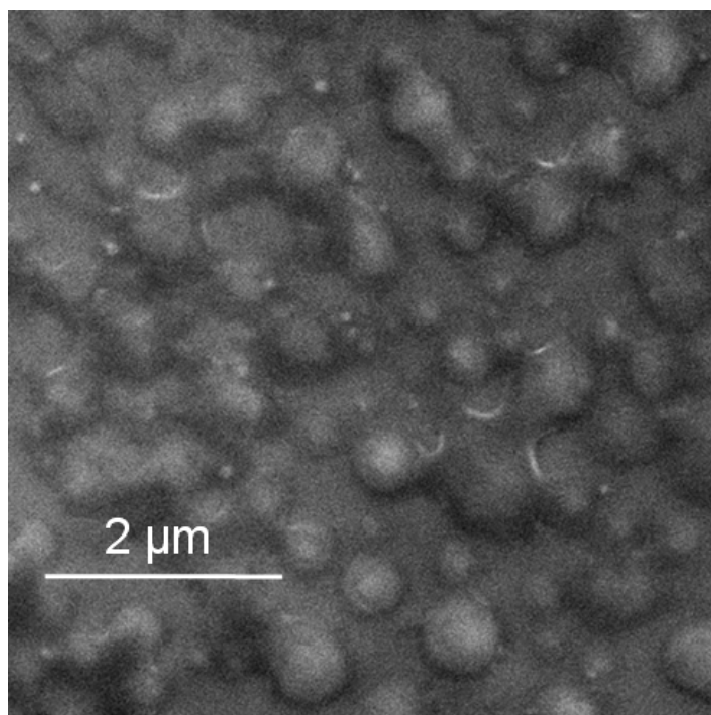

**Figure S8.** SEM images of  $[2]_2 \bullet L^3$  drop cast onto HOPG from  $5 \times 10^{-6}$  M solution in tetrahydrofuran.
